# Supplementary material for: Dynamic DNA Methylation Changes ofTbx21andRorcduring Experimental Autoimmune Uveitis in Mice
Source: Hindawi journal article supplement (doi:10.1155/2018/9129163), 2018-09-04

**Table S1.** Location information of methylation detection primers and CpG islands for *Tbx21*, *Gata3*, *Rorc* and *Foxp3*

| Gene         | CpG island location (from TSS) | Detect region of methylation primers (from TSS) |
|--------------|--------------------------------|-------------------------------------------------|
| <i>Tbx21</i> | From 899 to 2020               | From 1806 to 1998                               |
| <i>Gata3</i> | From 957 to 1181               | From 895 to 1217                                |
| <i>Rorc</i>  | From 1516 to 1574              | From 1459 to 1739                               |
| <i>Foxp3</i> | From 1560 to 1639              | From 1496 to 1848                               |

*Tbx21*

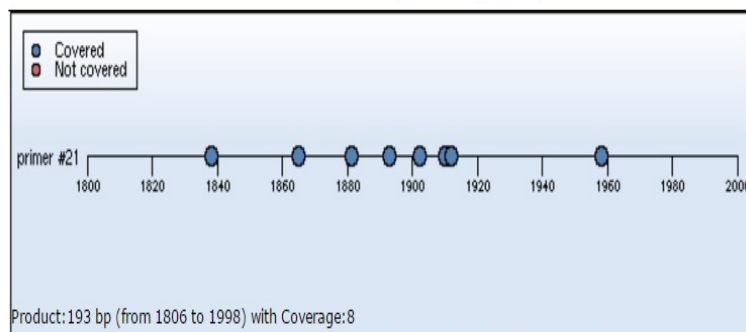

*Gata3*

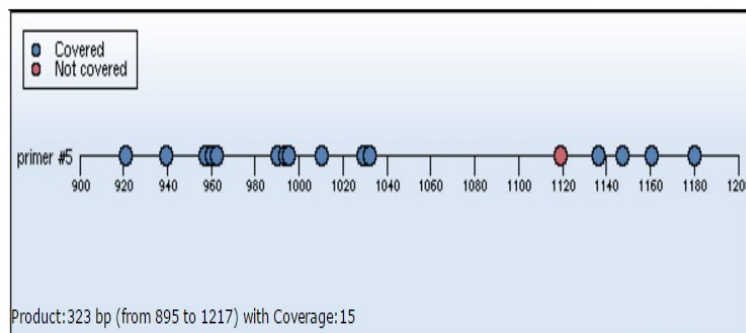

*Rorc*

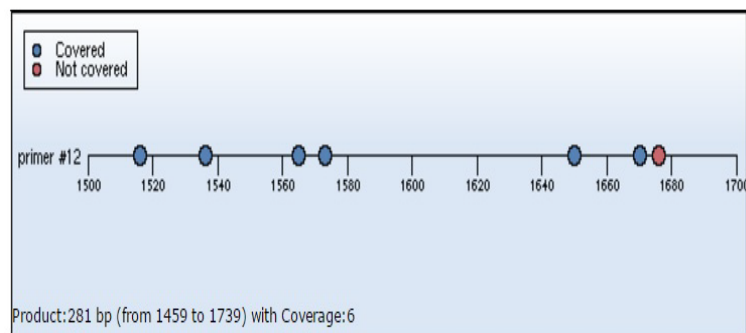

*Foxp3*

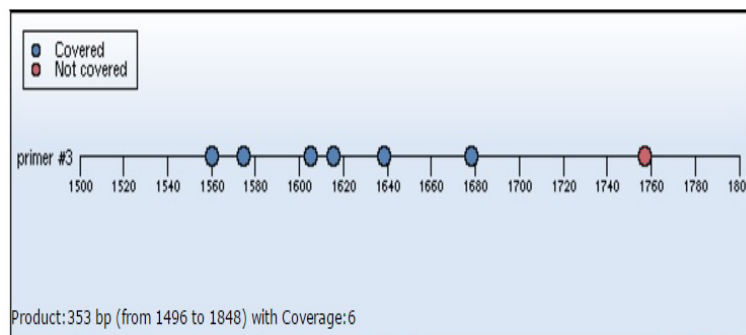

Supplement: f1 [file 9129163.f1.pdf]
